# Supplementary material for: A multifunctional anode with P-doped Si nanoparticles in a stress-buffering network of poly-γ-glutamate and graphene
Source: Royal Society of Chemistry journal article supplement (doi:10.1039/d0cc06623k), 2020-01-01
Supplement: d0cc06623k1.pdf [file d0cc06623k1.pdf]

## Electronic Supplementary Information

### Multifunctional Anode Materials with P-Doped Si Nanoparticles in Conductive and Stress-Buffering Network of Poly- $\gamma$ -Polyglutamate and Graphene

*Ren Na<sup>#,†</sup>, Nadine Madiou<sup>#</sup>, Ning Kang<sup>#</sup>, Shan Yan<sup>#</sup>, Jin Luo<sup>#</sup>, Guojun Liu, Zhongqiang Shan, Jianhua Tian<sup>†,\*</sup>, Chuan-Jian Zhong<sup>#,\*</sup>*

Dr. Ren Na, Nadine Madiou, Dr. Ning Kang, Dr. Shan Yan, Dr. Jin Luo, Prof. Chuan-Jian Zhong  
Department of Chemistry, State University of New York at Binghamton, Binghamton, New York 13902, United States  
E-mail: cjzhong@binghamton.edu

Dr. Ren Na, Prof. Jianhua Tian and Prof. Zhongqiang Shan  
School of Chemical Engineering and Technology, Tianjin University, Tianjin, 300350, China  
E-mail: jhtian@tju.edu.cn

Dr. Guojun Liu  
Suzhou Gorichen Technology Co., Suzhou Wuzhong Economic Development Zone, China

## Experimental Section

### Chemicals

Graphite flake (~325 mesh, 99.8%) and hydrogen peroxide (30%) were purchased from Alfa Aesar. Sulfuric Acid (98%) and phosphoric acid (86%) were purchased from J.T.Baker. Potassium permanganate (99%) and L-Ascorbic Acid (99%) were bought from Sigma Aldrich. The deionized water (18.2 M  $\Omega$ ) obtained by the purification system was used. All the chemicals were used as received.

### Synthesis of P-Si/G

Graphene oxide was prepared by modified Hummer's method reported previous work. P-Si nanoparticles were synthesized via spark-discharge method by using SiH<sub>4</sub> and PH<sub>3</sub> and the final P content in P-Si is around 20 ppm which is identified by XRF and the average size of P-Si is 110 nm. Generally, 100 mg of P-Si nanoparticles were dispersed into 100 mL of graphene oxide aqueous solution with a concentration of 0.2 mg mL<sup>-1</sup> under ultrasonic for 0.5 h. Subsequently, 20 mg of L-ascorbic as the reductant was added into above mixture and the temperature of the reaction system was heated at 75 °C for 8 h. The intermediate was washed by water and ethanol, finally dried in vacuum oven under 60 °C overnight followed by annealing under argon atmosphere at 550 °C for 2 h. For comparison, we also synthesized P-

Si/C composite using commercial carbon material, i.e. graphene nanoplates (GNPs) and carbon nanotube (CNT). With the same loading of P-Si, P-Si/C composites were obtained by sonication with the above carbon materials aqueous solutions and following stirring overnight. The corresponding P-Si/C composites are denoted as P-Si/GNPs and P-Si/CNT.

### **Synthesis of different cations modified PGA**

PGA was synthesized according to previous work. Different cations modified PGA were obtained by adding PGA powder directly into 0.1 M LiOH, NaOH, KOH and ammonia under magnetic stirring for 12 h and the pH value of the mixture was fixed at 9. The above solution were used as binder directly.

### **Materials Characterization**

The morphology and inner structure of P-Si/G were characterized by scanning electron microscope (SEM, LEO-1550), transmission electron microscopy (TEM, JEOL JEM-ARM200F) and X-ray diffraction (XRD). Thermogravimetric analysis (TGA) was performed from room temperature to 900 °C under air atmosphere. The fourier transform infrared spectroscopy (FT-IR) spectra of Nano-Si were documented with KBr pellets from Avatar360 (Thermo Nicolet, USA). The viscosity test was conducted at room temperature by using a cone-plate rheometer (AR1000, Texas Instrument).

Electrochemical performance tests were done using CR2032-type coin cell with a MPG2 potential station (EC lab software, BioLogic) in a potential voltage from 0.01 to 1 V vs Li<sup>+</sup>/Li at room temperature. The working electrodes were composed of P-Si/G composite (80 wt%), Super P (10 wt%) and alginate sodium or PGA which was synthesized by our previous study (10 wt %). The mass loading of P-Si/G electrode is from 0.9~1.2 mg cm<sup>-2</sup>. Lithium foil was used as counter electrode and the separator is from Celgard C480. The electrolyte solution was 1M LiPF<sub>6</sub>/ethylene carbonate (EC)/dimethyl carbonate (DMC) (1:1 by volume). The batteries were assembled in glove box with oxygen and water content less than 0.1 ppm.

The morphology of the P-Si/G electrode before and after 1 cycle is characterized by optical microscopy (Nikon, ECLIPSE).

**Additional Figures and Table:**

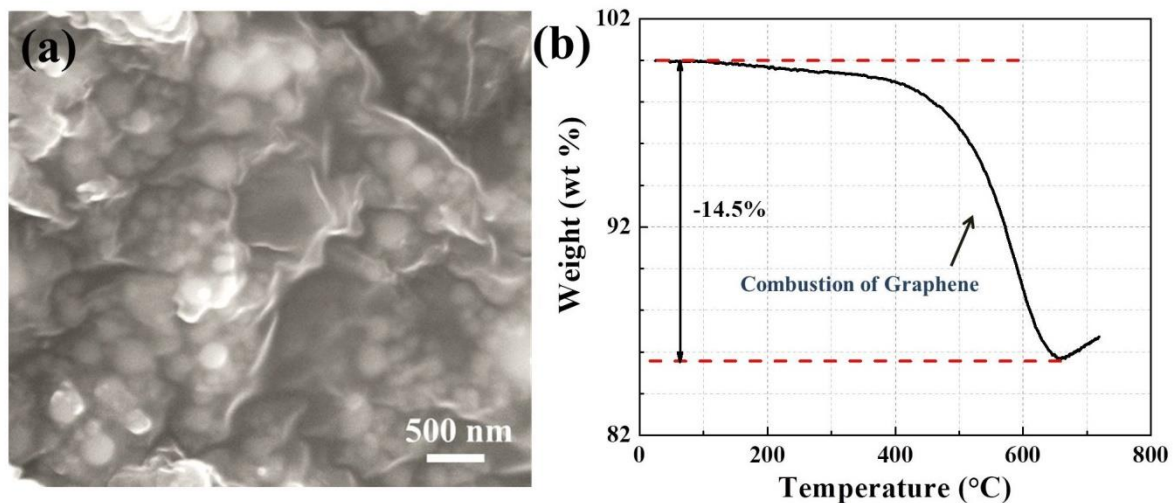

**Figure S1.** SEM (a) and TGA curve (b) of P-Si/G composite.

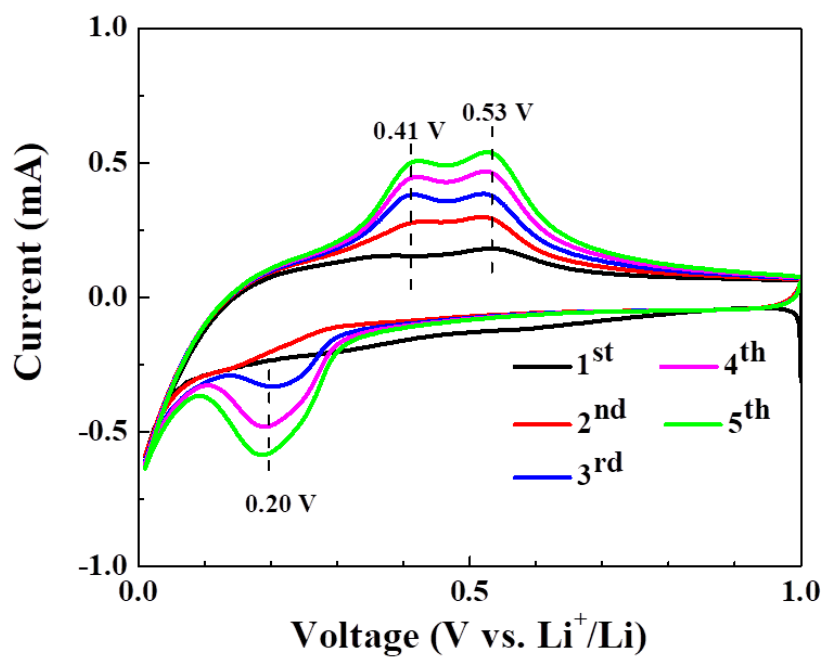

**Figure S2** Cyclic voltammetric curves showing the electrochemical performance of the P-Si/G composite.

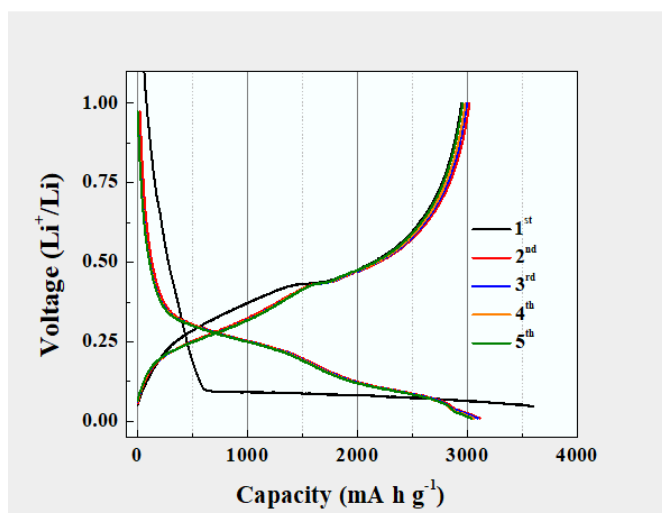

**Figure S3.** Charge/discharge curve of P-Si/G electrode.

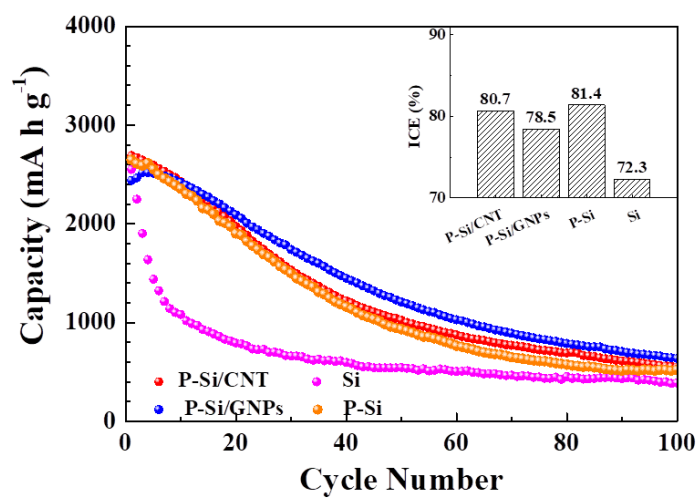

**Figure S4.** Cycling performance of P-Si/CNT, P-Si/GNPs, P-Si and Si electrode.

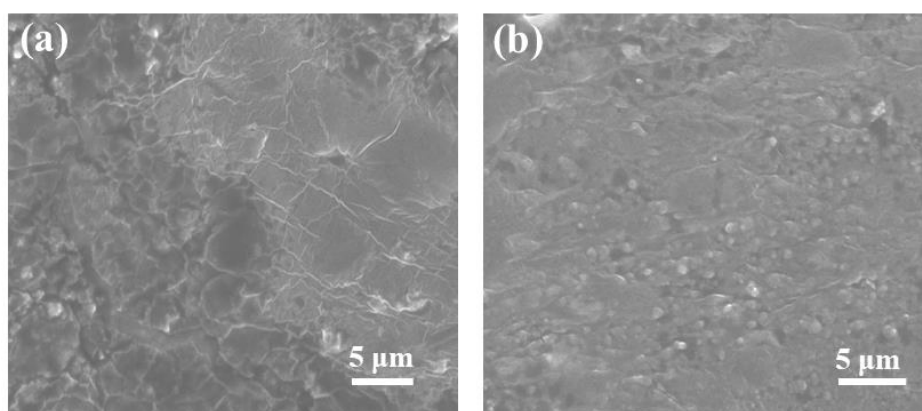

**Figure S5.** Comparison of morphology between Si electrode (a) and P-Si/G (b) electrode after cycling.

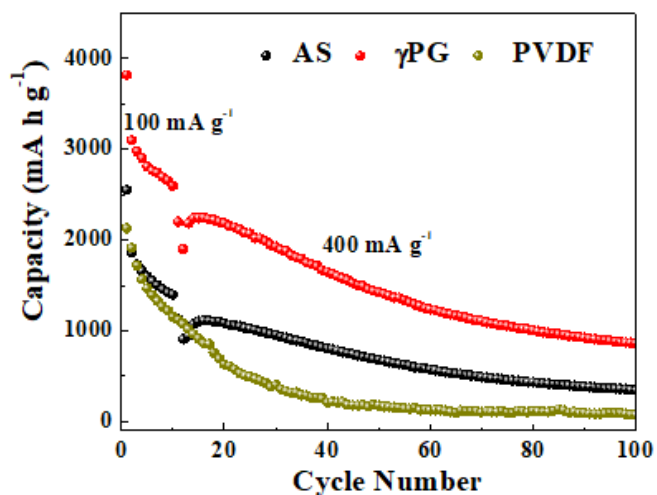

**Figure S6.** Cycling performance of Si nanoparticles electrode by utilizing different binders.

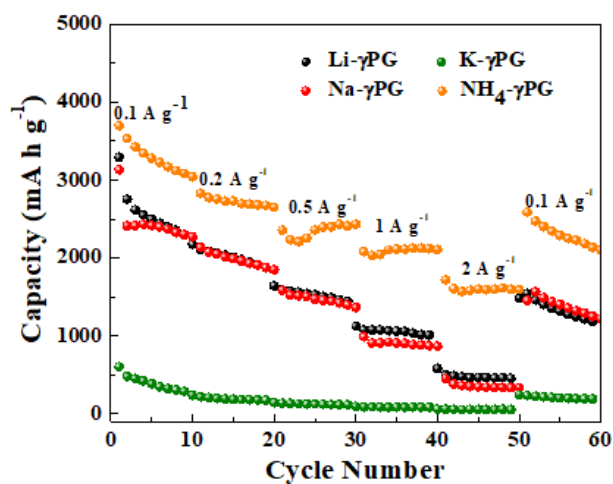

**Figure S7.** Rate capability of Si nanoparticles electrode using different cations modified PGA.

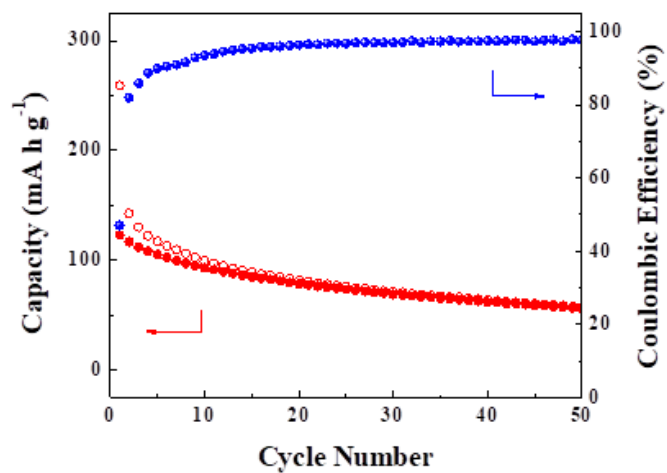

**Figure S8.** Cycling performance of P-Si/G electrode full cell using LCO as cathode at 1 C between 2 and 4.3 V.

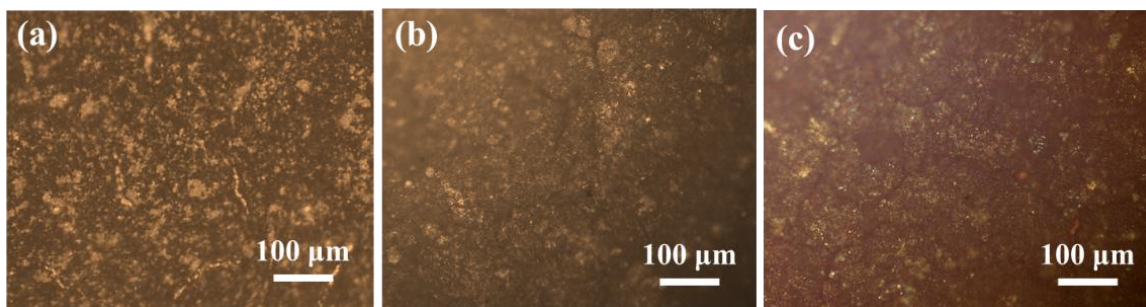

**Figure S9.** Direct observing of self-healing capability of P-Si/G electrode: (a) before cycling, (b) after 1<sup>st</sup> discharge and (c) after 1<sup>st</sup> discharge for 5 min.

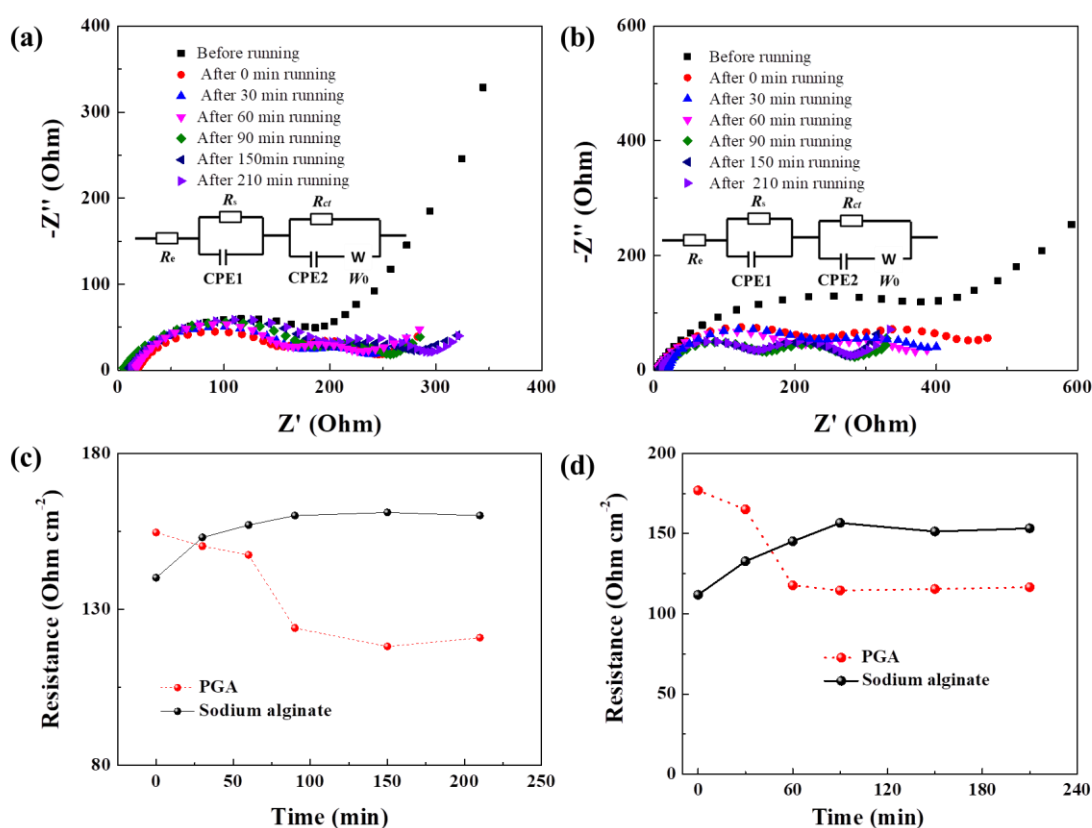

**Figure S10.** Time-dependent Nyquist plot of P-Si/G electrode using sodium alginate (a) and PGA (b) as binder. (inset is the equivalent circuit), the  $R_{SEI}$  and  $R_{ct}$  values of P-Si/G electrode with PGA and sodium alginate binder changes along with the time (c) and (d).

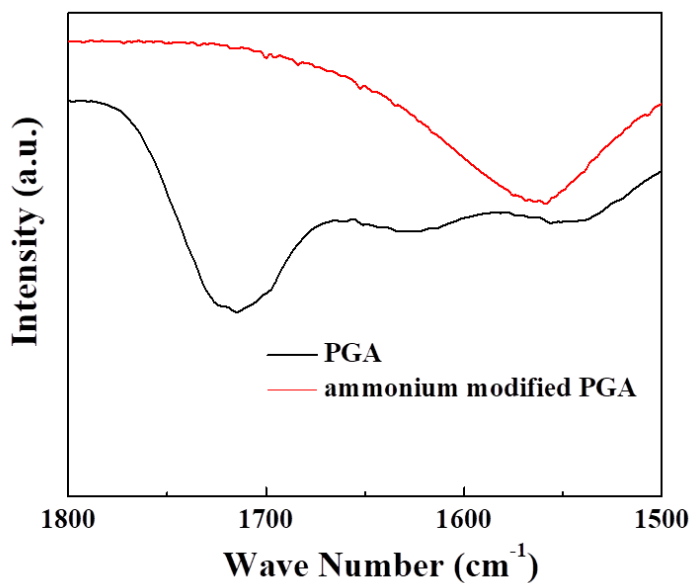

**Figure S11.** FTIR spectra of PGA and ammonia modified PGA.

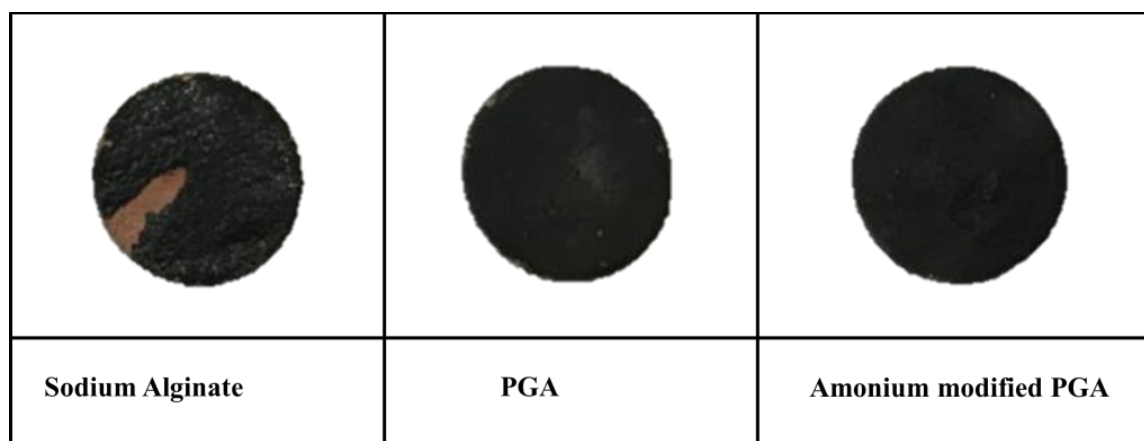

**Figure S12.** Digital graph of P-Si electrodes after 100 cycles using sodium alginate, PGA and amonium modified PGA as binder.

**Table S1.** Viscosity of  $\text{Li}^+$ ,  $\text{Na}^+$ ,  $\text{K}^+$  and  $\text{NH}_4^+$  modified PGA solution (at 25 °C when the concentration is  $0.6 \text{ mg mL}^{-1}$ ).

|                      | <b>Li-<math>\gamma</math>PGA</b> | <b>Na-<math>\gamma</math>PGA</b> | <b>K-<math>\gamma</math>PGA</b> | <b>NH<sub>4</sub>-<math>\gamma</math>PGA</b> | <b><math>\gamma</math>PGA</b> | <b>DI water</b> |
|----------------------|----------------------------------|----------------------------------|---------------------------------|----------------------------------------------|-------------------------------|-----------------|
| Viscosity<br>(mPa·s) | 2.6                              | 2.6                              | 2.7                             | 3.7                                          | 2.8                           | 0.9             |

**Table S2.** Comparison of mass loading and electrochemical performance of previous reported Si anode.

| Ref. | Mass loading (mg cm <sup>-2</sup> ) | Cycling performance                                                 |
|------|-------------------------------------|---------------------------------------------------------------------|
| [1]  | 1                                   | 722mAh g <sup>-1</sup> at 0.1 A g <sup>-1</sup> after 100 cycles    |
| [2]  | 0.9                                 | 1325 mAh g <sup>-1</sup> at 0.2 A g <sup>-1</sup> after 60 cycles   |
| [3]  | 1                                   | 1660 mAh g <sup>-1</sup> at 0.2 A g <sup>-1</sup> after 100 cycles  |
| [4]  | 1.5                                 | 534.3 mAh g <sup>-1</sup> at 0.5 A g <sup>-1</sup> after 200 cycles |
| [5]  | 0.8-1.2                             | 1107 mAh g <sup>-1</sup> at 0.5 A g <sup>-1</sup> after 100 cycles  |
| [6]  | 0.6-0.7                             | 1000 mAh g <sup>-1</sup> at 0.1 A g <sup>-1</sup> after 50 cycles   |
| [7]  | 1.4                                 | 595 mAh g <sup>-1</sup> at 0.2 A g <sup>-1</sup> after 200 cycles   |
| [8]  | 0.8-1.1                             | 1002 mAh g <sup>-1</sup> at 0.1 A g <sup>-1</sup> after 100 cycles  |
| [9]  | 0.7                                 | 1670 mAh g <sup>-1</sup> at 0.1 C after 100 cycles                  |
| [10] | 0.8-1                               | 1031 mAh g <sup>-1</sup> at 0.5 A g <sup>-1</sup> after 100 cycles  |
| [11] | 0.5-0.7                             | 1300 mAh g <sup>-1</sup> at 0.5C after 150 cycles                   |

## References

- [1] Sun Y, Lopez J, Lee H-W, et al. A Stretchable Graphitic Carbon/Si Anode Enabled by Conformal Coating of a Self-Healing Elastic Polymer[J]. *Advanced Materials*, 2016, 28(12): 2455-2461.
- [2] Liang G, Qin X, Zou J, et al. Electrosprayed silicon-embedded porous carbon microspheres as lithium-ion battery anodes with exceptional rate capacities[J]. *Carbon*, 2018, 127: 424-431.
- [3] Yi Z, Qian Y, Cao C, et al. Porous Si/C microspheres decorated with stable outer carbon interphase and inner interpenetrated Si@C channel for enhanced lithium storage[J]. *Carbon*, 2019, 149: 664-671.
- [4] Cui M, Wang L, Guo X, et al. Designing of hierarchical mesoporous/macroporous silicon-based composite anode material for low-cost high-performance lithium-ion batteries[J]. *Journal of Materials Chemistry A*, 2019, 7(8): 3874-3881.
- [5] Liu N, Liu J, Jia D, et al. Multi-core yolk-shell like mesoporous double carbon-coated silicon nanoparticles as anode materials for lithium-ion batteries[J]. *Energy Storage Materials*, 2019, 18: 165-173.
- [6] Wang K-L, Kuo T-H, Yao C-F, et al. Cyclopentadithiophene-benzoic acid copolymers as conductive binders for silicon nanoparticles in anode electrodes of lithium ion batteries[J]. *Chemical Communications*, 2017, 53(11): 1856-1859.
- [7] Parekh M H, Parikh V P, Kim P J, et al. Encapsulation and networking of silicon nanoparticles using amorphous carbon and graphite for high performance Li-ion batteries[J]. *Carbon*, 2019, 148: 36-43.
- [8] Zhang F, Zhu G, Wang K, et al. Encapsulation of core-satellite silicon in carbon for rational balance of the void space and capacity[J]. *Chemical Communications*, 2019, 55(71): 10531-10534.



- [9] Shin J, Cho E. Agglomeration Mechanism and a Protective Role of  $\text{Al}_2\text{O}_3$  for Prolonged Cycle Life of Si Anode in Lithium-Ion Batteries[J]. Chemistry of Materials, 2018, 30(10): 3233-3243.
- [10] Zhang Y-C, You Y, Xin S, et al. Rice husk-derived hierarchical silicon/nitrogen-doped carbon/carbon nanotube spheres as low-cost and high-capacity anodes for lithium-ion batteries[J]. Nano Energy, 2016, 25: 120-127.
- [11] Munaoka T, Yan X, Lopez J, et al. Ionically Conductive Self-Healing Binder for Low Cost Si Microparticles Anodes in Li-Ion Batteries[J]. Advanced Energy Materials, 2018, 8(14): 1703138.
